# Supplementary material for: Levels of PIVKA-II and alpha-fetoprotein in unresectable hepatocellular carcinoma compared to healthy controls and predictive values of both markers with radiological responses after loco-regional interventions
Source: PeerJ. 2023 Sep 25;11:e15988. doi: 10.7717/peerj.15988 (PMC10538296; doi:10.7717/peerj.15988)
Supplement: Data S1 [file peerj-11-15988-s001.xlsx]

## Sheet: Sheet1
NAME	IL 6 PRE	IL6 POST	PIVKA PRE	PIVKA POST	AFP PRE	AFP POST	RADIO RESPONSE		total bilirubin	Albumin	ALT	AST	ALP	DATE
HCC
HCC 1	244.1		1667.47	NO	1549.3	NO	PR		54.7	25	198	487	540	12062018
HCC 2	23.12		7349	12423	NO	NO	PROG		23	27	96	113
HCC 3	63.59		6.43		2093.25				30.6	30	116	164	308	23072018
HCC 4	63.59		435.72	138.73	7.4	29.1	PR		13	41	46	41	168	12082018
HCC 5	11.75		22.47	20.17	8.27	6.37	PR		9	32	71	53	91	26082018
HCC 6	58.28		252842	4759	2000		PROG		23	33	31	218
HCC 7	12.76		48.32	22.48	4.95	17.21	STABLE		24	25	41	54	146	16122018
HCC 8	33.23		88.55	38.99	8.5	8.5	COMPLETE RESPONSE		15	29	41	118	560	15012019
HCC 9	38.34		50080.4		2000				19	27	119	124						PR- PARTIAL RESPONSE
HCC 10	23.36		999.6		8.5				WRONG RN									S- STABLE
HCC 11	11.96		801.7	308.4	8.66		PR		25	26	24	34	95	17112020				C-COMPLETE RESPONSE
HCC 12	18.16		30663.1		22637				98	33	51	34	876	5052019				PROG-PROGRESSIVE DISEASE
HCC 13	1862		977.11	48.9	1934.72		PR		22	34	70	91	92	3042019
HCC 14	352.5		23447.1	124.9	127.39		STABLE		21	29	18	34	188	1042019
HCC 15	23.35		103884	50591.9	3285	932.34	PROG		42	29	87	142	331	1042019
HCC 16	382.3		491.03	431.9	1546.24		STABLE		9	40	59	61	373	28052019
HCC 17	303		4351.57		280.23				12	43	73	47	80	19032019
HCC 18	38.55		1138.2	312	28.25		STABLE		17	20	20	102	478	8042019
HCC 19	18.86		101372	3124	8.5		STABLE		98	26	88	157	167	27022019
HCC 20	25.51		7494	17040	300000		STABLE		10	26	28	177	223	30012019
HCC 21	24.57		37324.3	3487.78	118.38	46.4	STABLE		17	40	50	39	162	24012019
HCC 22	18.21		1239	519	5.9	6.87	PR		31	23	468	971	369	29062018
HCC 23	36.15		3087.16	270.65	789.01	193.2	PROG		60	28	107	125	199	26062018
HCC 24	38.63		3541.57	90877.5	79.57	2000	S		20	33	54	58	158	20052018
HEALTHY SUBJECT
HS 1	2.64		24.5		0.7
HS 2	1.5		16.22		1.54
HS 3	1.5		27.98		2.42
HS 4	6.98		17		1.73
HS 5	1.5		38.62		3.08
HS 6	44.62		23.26		4.75
HS 7	1.58		21.27		0.78
HS 8	1.5		24.14		2.54
HS 9	1.5		21.54		1.19
HS 10	90.18		8.28		2.88
HS 11	22.12		19.35		1.55
HS 12	1.5		16.34		1.58
HS 13	1.5		24.31		1.25
HS 14	67.15		16.45		1.08
HS 15	40.99		15.3		2.26
HS 16	38.19		20.71		2.17
HS 17	25.14		24.63		2.03
HS 18	1.62		16.01		1.67
HS 19	18.92		22.23		0.9
HS 20	1.5		23.28		1.74
HS 21	1.5		28.06		0.56
HS 22	1.5		15.39		1.26
HS 23	1.5		26.34		2.48
HS 24	1.5		31.3		1.9
HS 25	2.58		37.48		1.17
HS 26	1.5		24.37		2.21
HS 27	5.57		31.58		0.84
HS 28	1.5		29.33		0.72
HS 30	1.5		18.24		2.07
HS 31	4.37		27.2		2.07
HS 32	31.72		30.8		1.63
HS 33	1.98		24.55		0.79
HS 34	50.75		27.41		2
HS 35	3.18		28.51		0.56
HS 36	1.5		12.92		2.57
HS 37	1.5		33.03		1.02
